# Supplementary material for: Efficient chemical synthesis for the analogue of ubiquitin-based probe Ub–AMC with native bioactivity
Source: Royal Society of Chemistry journal article supplement (doi:10.1039/c6ra11019c), 2016-01-01
Supplement: c6ra11019c1.pdf [file c6ra11019c1.pdf]

## Supporting Information

# Efficient Chemical Synthesis for the Analogue of Ubiquitin-Based Probe Ub-AMC with Native Bioactivity

*Ling Xu,<sup>a</sup> Yang Xu,<sup>a</sup> Qian Qu,<sup>b</sup> Chao-Jian Guan,<sup>b</sup> Guo-Chao Chu,<sup>a</sup> Jing Shi,<sup>\*a</sup> and Yi-Ming Li<sup>\*b</sup>*

<sup>a</sup>Department of Chemistry, University of Science and Technology of China, Hefei, 230016, China

<sup>b</sup>School of Biological and Medical Engineering, Hefei University of Technology, Hefei, Anhui 230009, China; and the State Key Laboratory of Medicinal Chemical Biology (NanKai University).

|                                                                                             |           |
|---------------------------------------------------------------------------------------------|-----------|
| <b>Experimental Section</b> .....                                                           | <b>S2</b> |
| <b>A. HPLC of peptide segments</b>                                                          |           |
| <b>B. One-pot ligation-desulfurization of Ub(Nle1-45)NHNH<sub>2</sub> and Ub(46C-76)AMC</b> |           |
| <b>C. The synthesis of Gly-AMC<sup>1</sup></b>                                              |           |
| <b>D. ESI-MS of product</b>                                                                 |           |

## Experimental Section

### A. HPLC of peptide segments

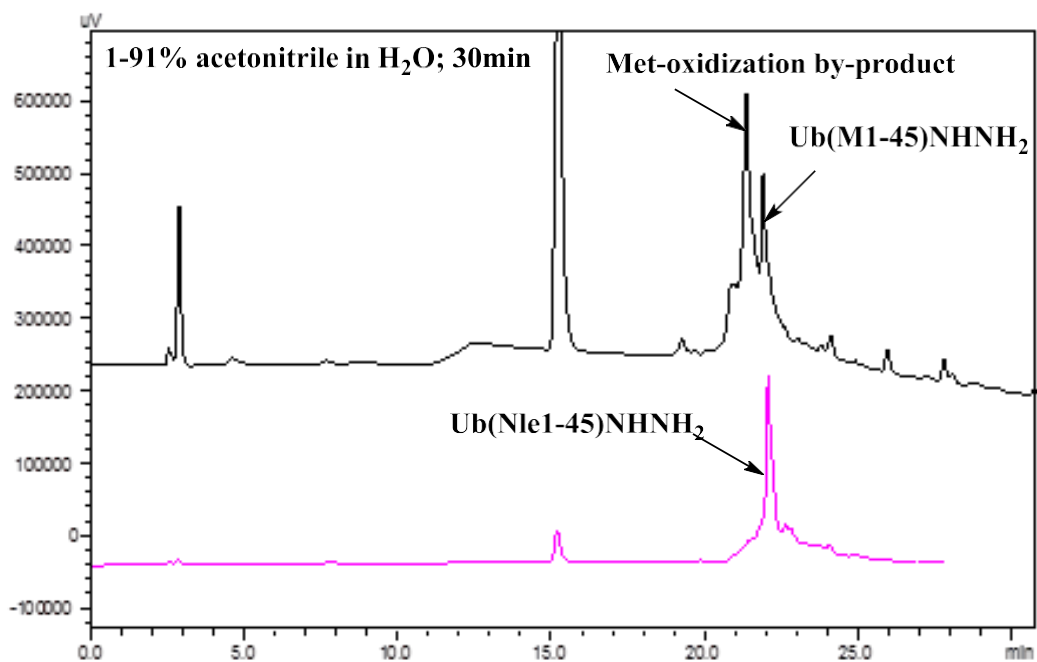

**Figure S1** HPLC of Ub(M1-45)-NHNH<sub>2</sub> and Ub(M1Nle-45)-NHNH<sub>2</sub> segment

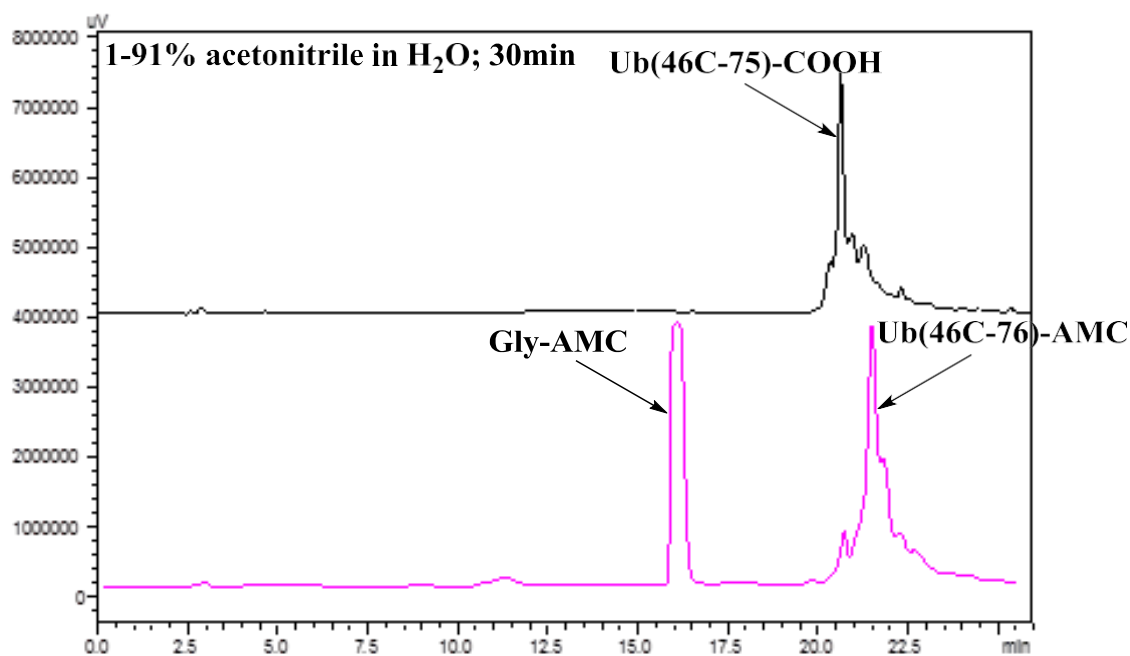

**Figure S2** HPLC of Ub(46C-75)-COOH and Ub(46C-76)-AMC segment

## B. One-pot ligation-desulfurization of Ub(Nle1-45)NHNH<sub>2</sub> and Ub(46C-76)AMC

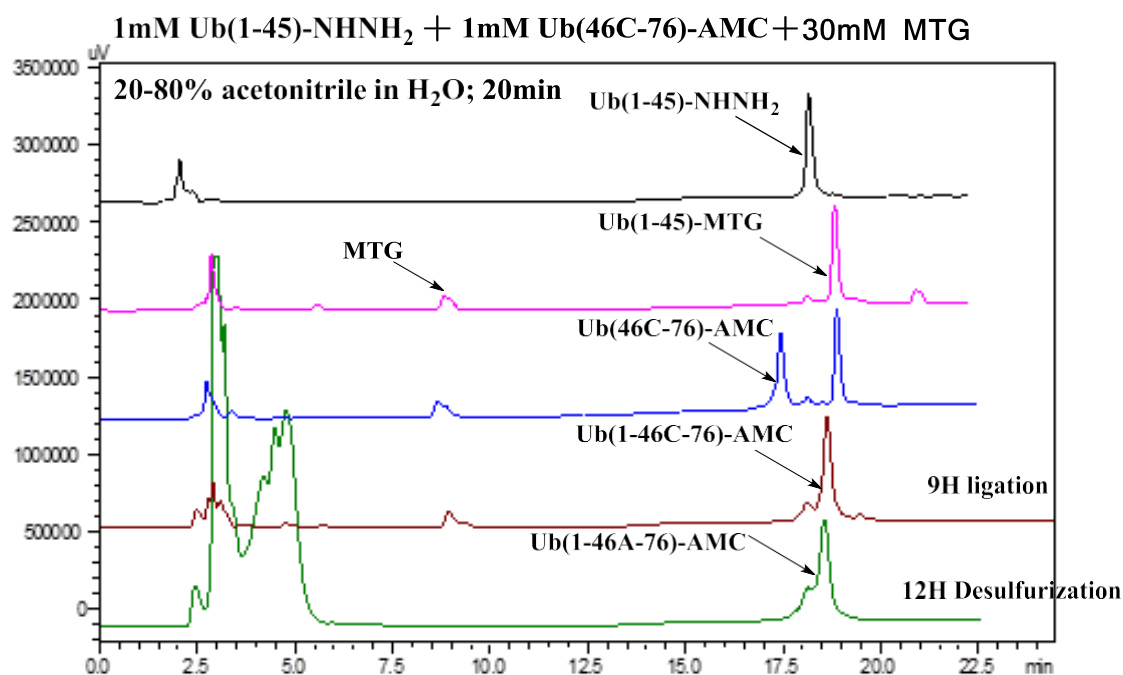

Figure S3 Ligation of two segments.

## C. The synthesis of Gly-AMC

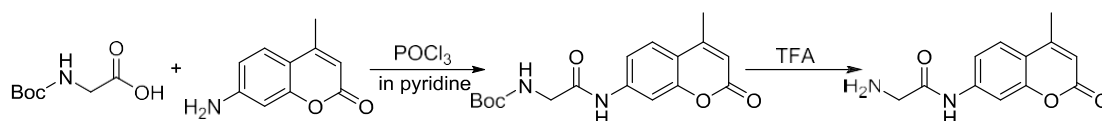

To a 100 mL round-bottom flask fitted with a stir bar were added 7-Amino-4-methylcoumarin (1.75 g, 10 mmol), Boc-Gly-OH (1.75 g, 10 mmol) and dried pyridine (35 mL). Then the POCl<sub>3</sub> (1 mL, 11 mmol) was added to the mixture dropwise in a -15°C ice/salt bath. After 3 h, the reaction mixture was allowed to warm to room temperature and stirred for an additional 16 h. Then the reaction was quenched with water. The mixture was washed with 4 M HCl (remove pyridine) and extracted with EtOAc. The organic phase was dried over Na<sub>2</sub>SO<sub>4</sub>, filtrated and concentrated. The crude product was purified by chromatography with a yield of 45% (1.49 g, 4.5 mmol).

To a 50 mL round-bottom flask fitted with a stir bar were added Boc-Gly-AMC (1.75 g, 10 mmol) and TFA (25 mL). The mixture was stirred for 3 h. The TFA was removed by rotary evaporation. The product H-Gly-AMC was sufficiently pure with a yield of 96% (1 g, 4.3 mmol). <sup>1</sup>H NMR (400 MHz, D<sub>2</sub>O) δ 7.16 (d, J = 8.7 Hz, 1H), 7.09 (s, 1H), 6.91 (d, J = 8.6 Hz, 1H), 5.84 (s, 1H), 3.85 (s, 2H), 2.03 (s, 3H).

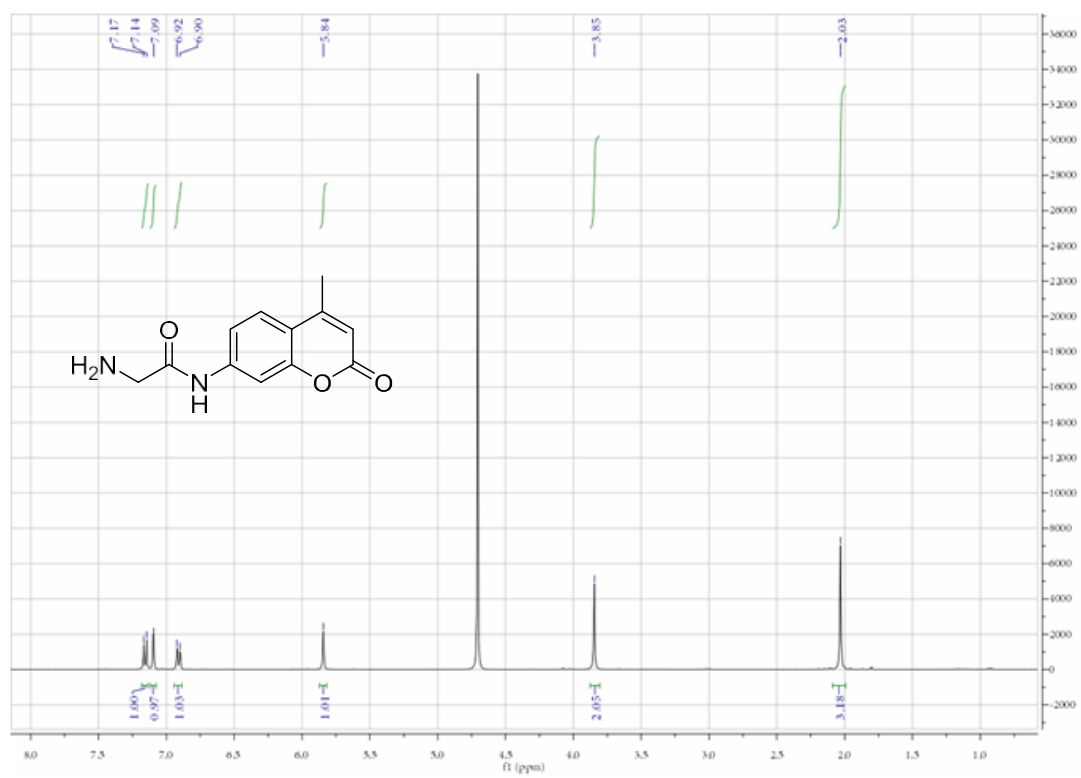

**Figure S4**  $^1\text{H}$  NMR of Gly-AMC

#### **D. ESI-MS of peptide segments**

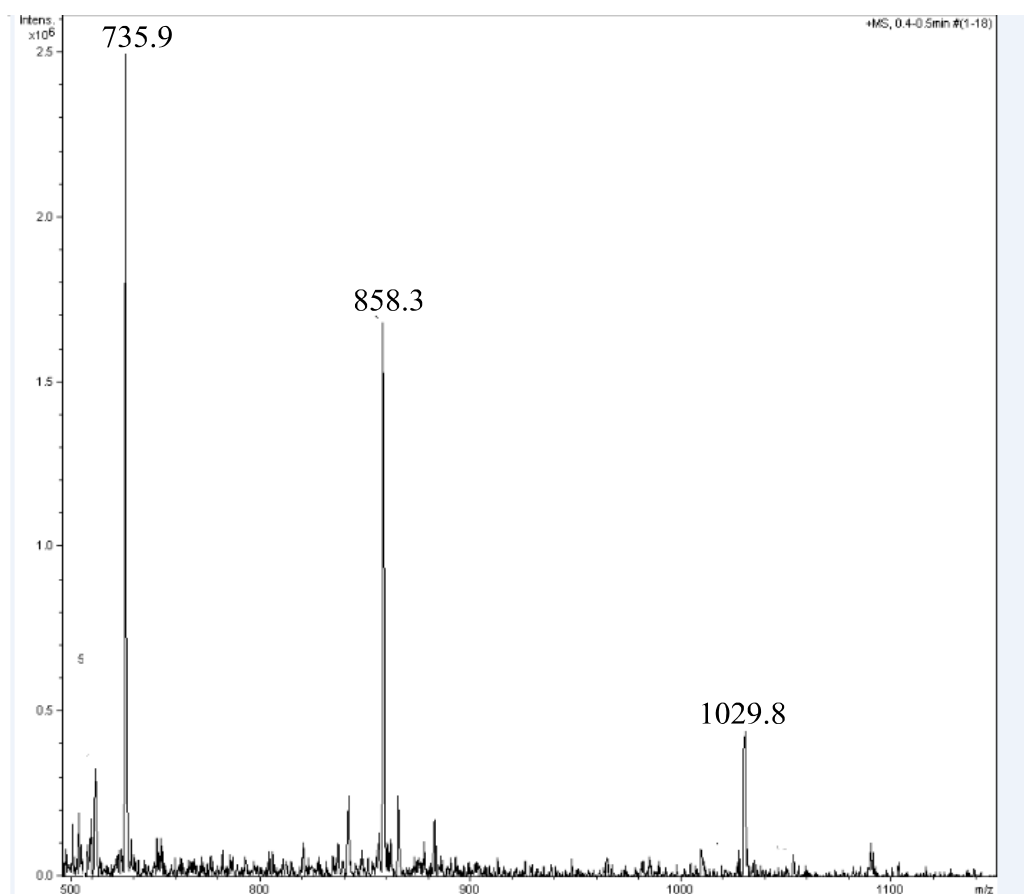

**Figure S5** ESI-MS of Met-oxidization Ub (Met1-45) NHH<sub>2</sub> (observed: 5144.0± 0.3 Da; calculated: 5143.9 Da).

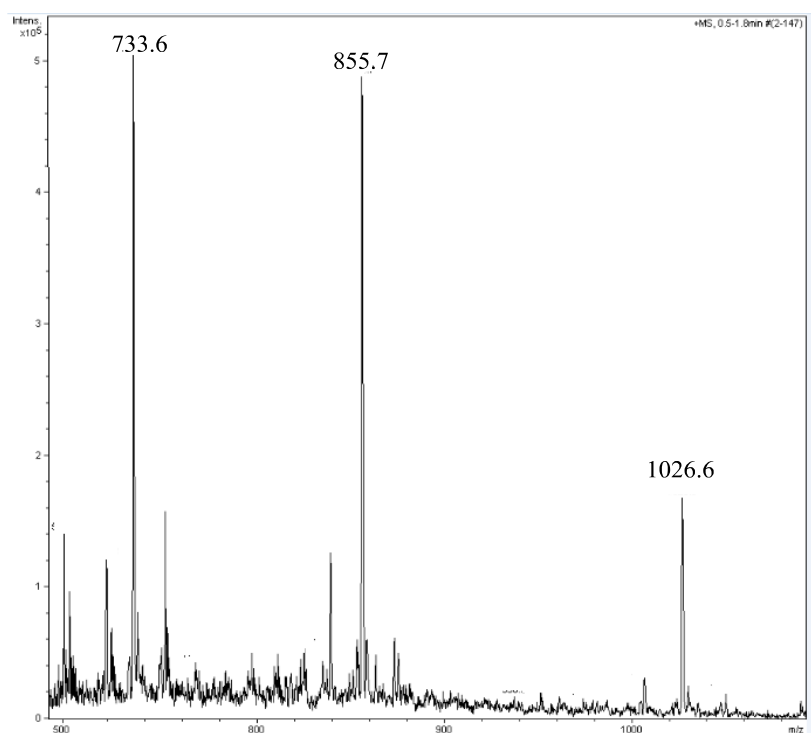

**Figure S6** ESI-MS of Ub (Met1-45) NHH<sub>2</sub> (observed: 5128.0± 0.3 Da; calculated: 5127.9 Da)

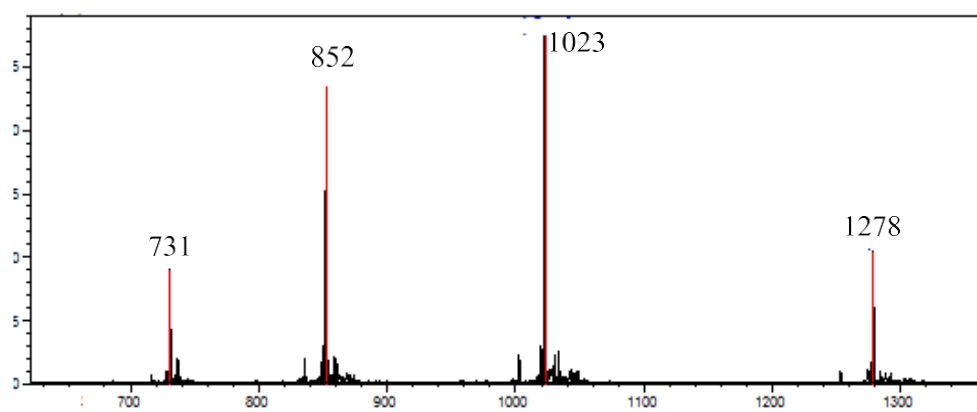

**Figure S7** ESI-MS of Ub (Nle1-45) NHNH<sub>2</sub> (observed: 5108.5± 1.5 Da; calculated: 5109.9 Da)

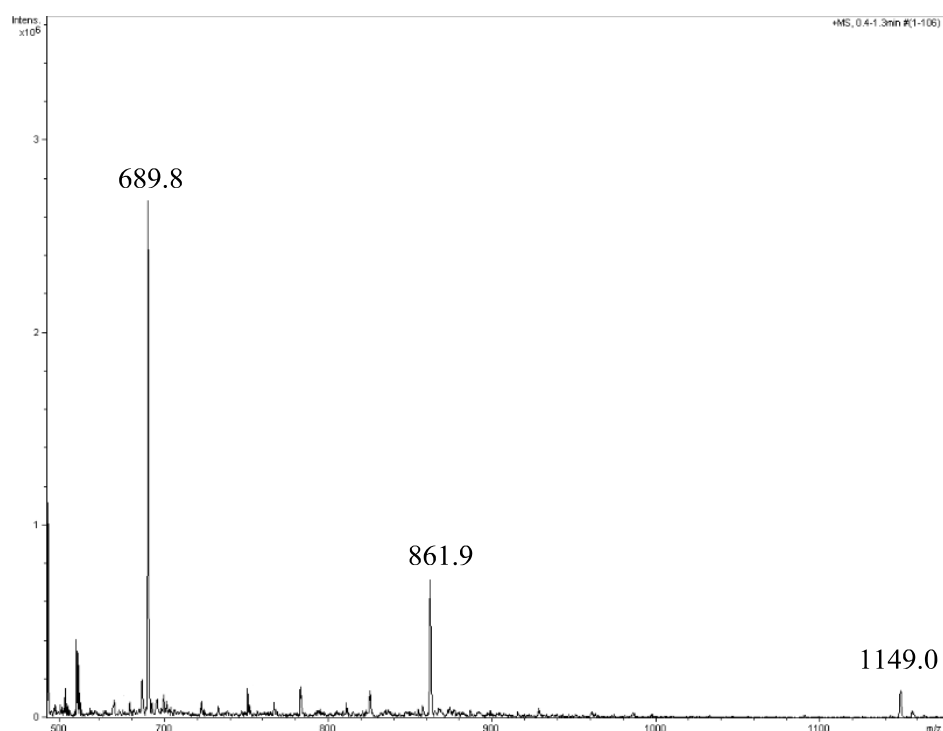

**Figure S8** ESI-MS of Ub (46C-75) COOH (observed: 3443.9.0± 0.3 Da; calculated: 3443.9 Da)

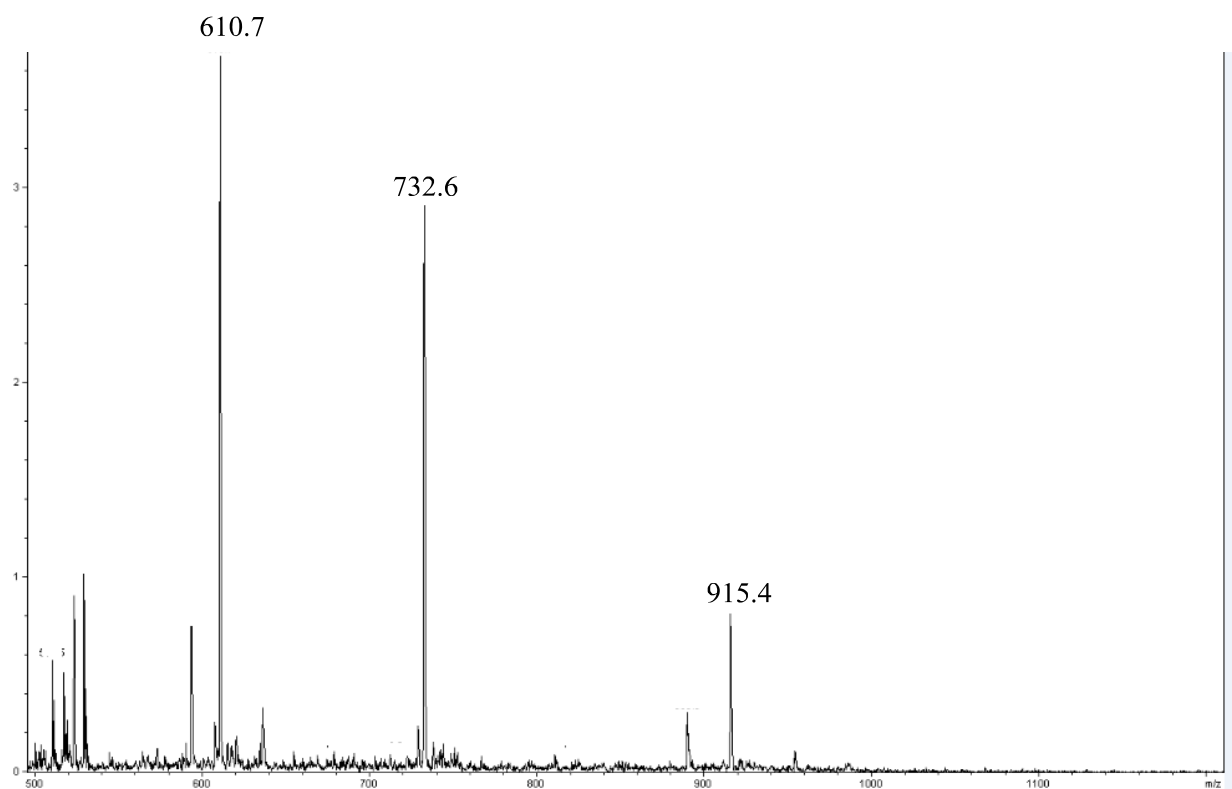

**Figure S9** ESI-MS of Ub (46C-76) AMC (observed:  $3657.9 \pm 0.3$  Da; calculated: 3658.2 Da)

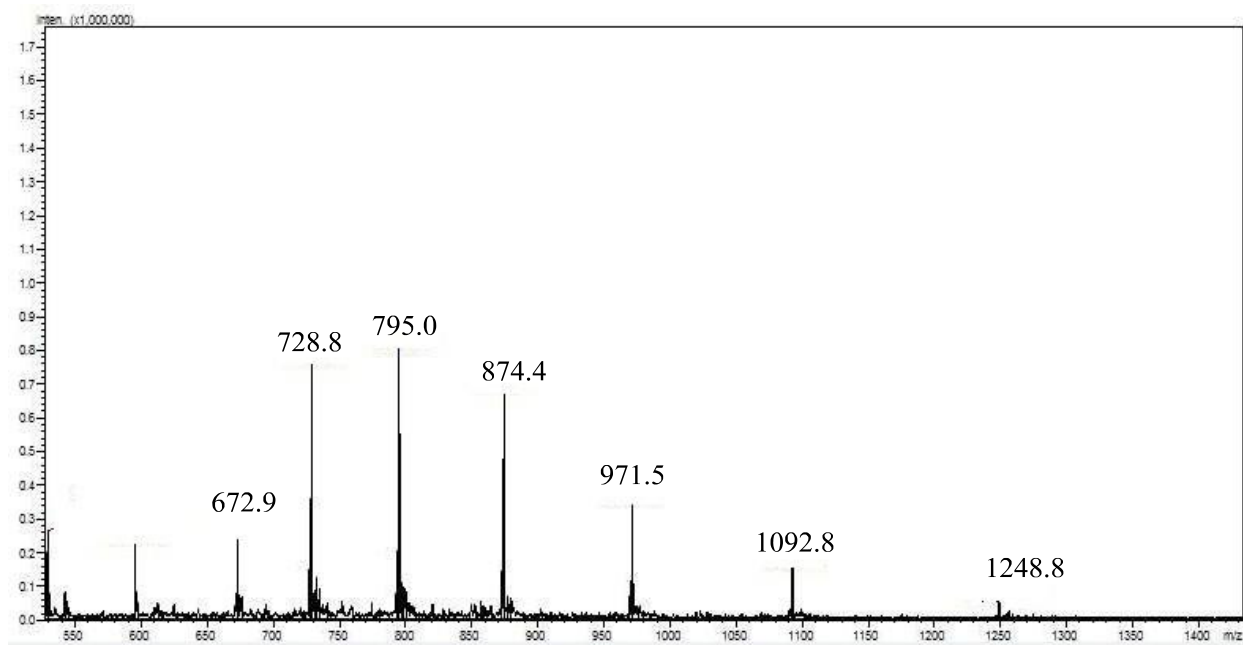

**Figure S10** ESI-MS of Ub (Nle1-46C-76)-AMC (observed:  $8734.2 \pm 0.6$  Da; calculated: 8736.1 Da)

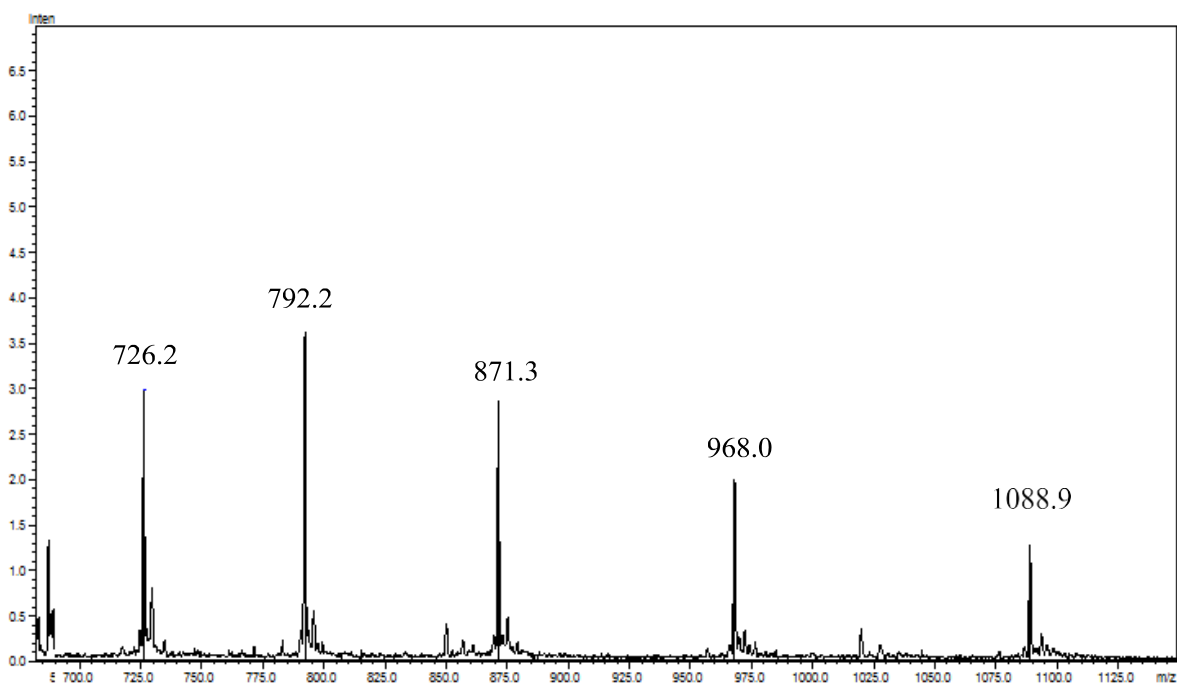

**Figure S11** ESI-MS of Ub (Nle1-76)-AMC (observed:  $8703.0 \pm 0.6$  Da; calculated: 8704.1 Da)

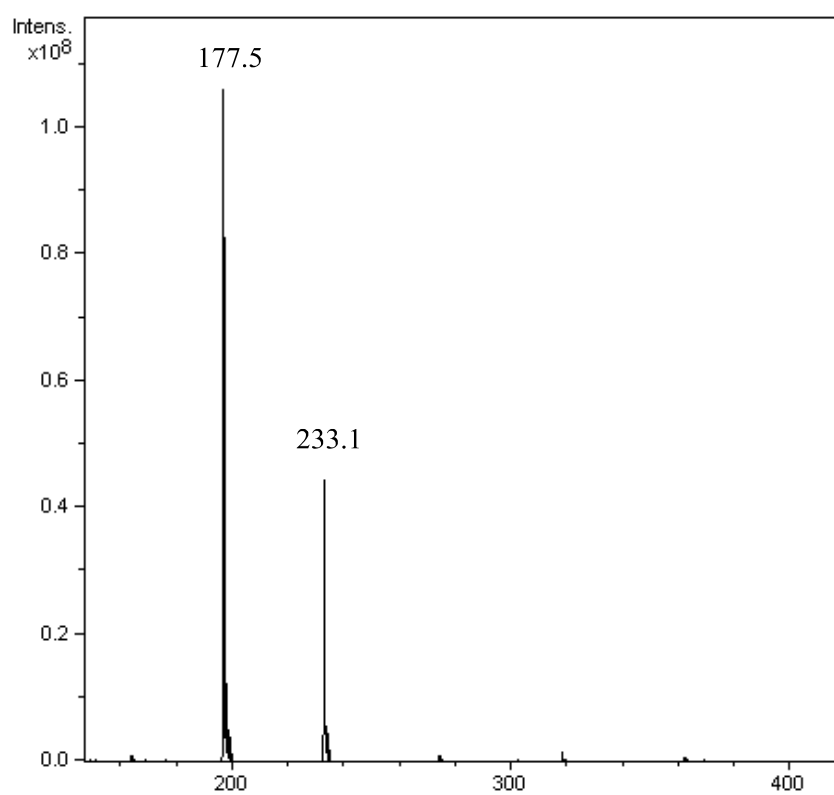

**Figure S12** ESI-MS of Gly-AMC (observed: 233.1 Da; calculated: 233.2 Da)



**Reference:**

1 J. Liang, G.M. Fang, X. L. Huang, Z. Q. Mei, J. Li, C. L. Tian, L. Liu, *Sci. China. Chem.*, 2013, **56**, 1301-1306.
